# Supplementary material for: Machine Learning Predicts the Oxidative Stress Subtypes Provide an Innovative Insight into Colorectal Cancer
Source: Hindawi journal article supplement (doi:10.1155/2023/1737501), 2023-04-21

**Supplement Figure1.** The heatmap for two OS-related subtypes.

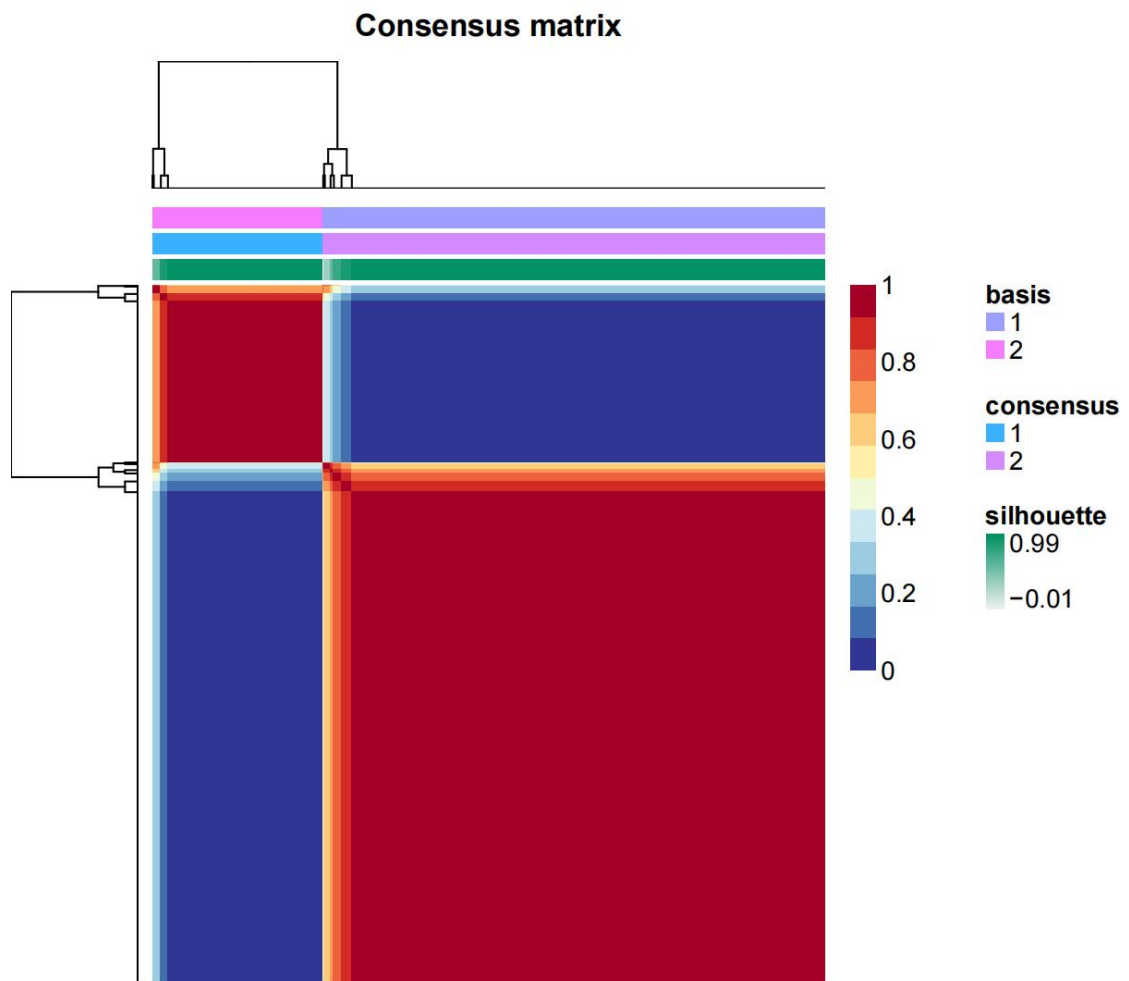

Supplement: f4 [file 1737501.f4.pdf]
